# Supplementary material
Source: PubMed Central journal article supplement (PMC4203394)
Supplement: tx5002699_si_001.pdf [file tx5002699_si_001.pdf]

Supporting Information

**Analysis of a Malondialdehyde-Deoxyguanosine Adduct in Human  
Leukocyte DNA by Liquid Chromatography Nanoelectrospray-High  
Resolution Tandem Mass Spectrometry**

Bin Ma,<sup>†</sup> Peter W. Villalta,<sup>†</sup> Silvia Balbo,<sup>†</sup> and Irina Stepanov\*,<sup>†, ‡</sup>

<sup>†</sup>Masonic Cancer Center and <sup>‡</sup>Division of Environmental Health Sciences, University  
of Minnesota, Mayo Mail Code 806, 420 Delaware Street SE, Minneapolis,  
Minnesota 55455, United States

Corresponding Author:

\*Phone: (612) 624-4998. Fax: (612) 626-5135. E-mail: [stepa011@umn.edu](mailto:stepa011@umn.edu).

## Table of Contents

|           |                                                                                                                                                    |   |
|-----------|----------------------------------------------------------------------------------------------------------------------------------------------------|---|
| Figure S1 | Chromatogram of a standard mixture of benzamide and 5,6-dihydro-M <sub>1</sub> dG during column chromatography purification                        | 3 |
| Figure S2 | Chromatograms obtained upon analysis of possible artifactual M <sub>1</sub> dG production during the sample preparation                            | 4 |
| Figure S3 | Product ion spectra of 5,6-dihydro-M <sub>1</sub> dG, and 5,6-dihydro-[ <sup>13</sup> C <sub>3</sub> ]M <sub>1</sub> dG                            | 5 |
| Figure S4 | The extracted ion chromatograms for 5,6-dihydro-M <sub>1</sub> dG at mass tolerances of 10 ppm, 5 ppm, and 2 ppm using the Orbitrap mass analyzer. | 6 |

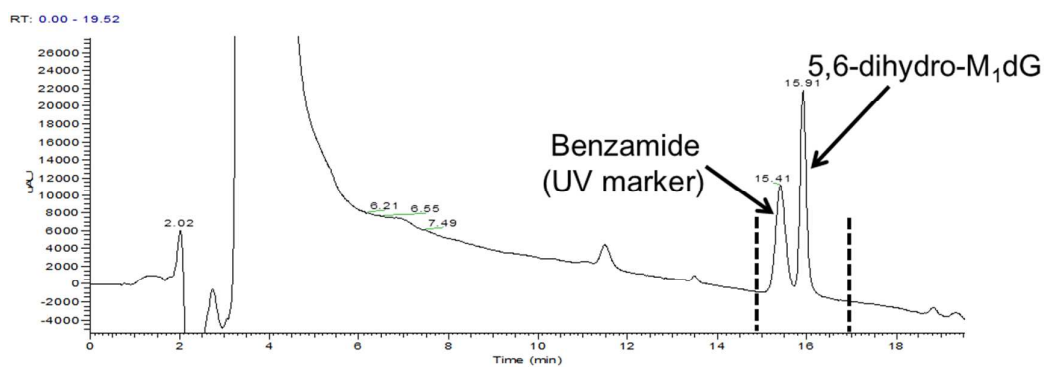

Figure S1. Chromatogram of a standard mixture of benzamide and 5,6-dihydro-M<sub>1</sub>dG during column chromatography purification, which was used to further purify human leukocyte DNA samples after SPE extraction. Benzamide was used as a UV marker, and fraction containing 5,6-dihydro-M<sub>1</sub>dG and its internal standard at 15~17 min was collected.

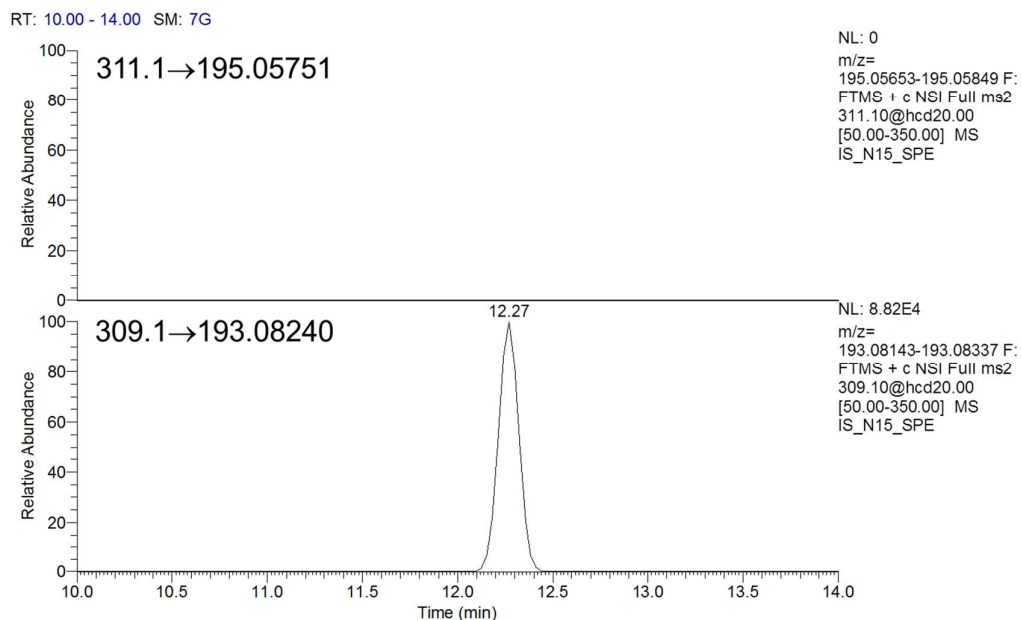

Figure S2. Chromatograms obtained upon analysis of possible artifactual M<sub>1</sub>dG production during sample preparation. The internal standards 5,6 dihydro-[<sup>13</sup>C<sub>3</sub>]M<sub>1</sub>dG and 5,6 dihydro-[<sup>15</sup>N<sub>5</sub>]M<sub>1</sub>dG are monitored by the MS transition  $m/z$  309.1→193.0824 and  $m/z$  311.1→195.0575, respectively. No peak of 5,6 dihydro-[<sup>15</sup>N<sub>5</sub>]M<sub>1</sub>dG was detected, indicating no artifactual M<sub>1</sub>dG adduct was formed during the sample preparation.

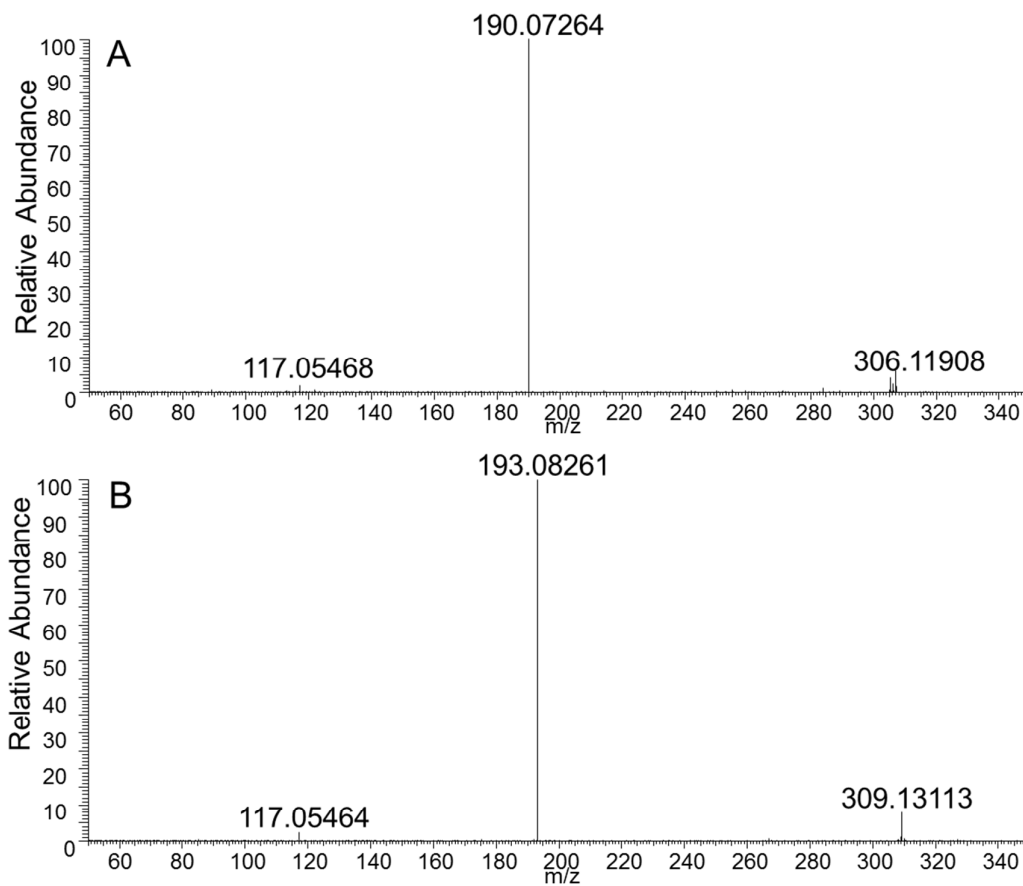

Figure S3. Product ion spectra of (A) 5,6-dihydro-M<sub>1</sub>dG, and (B) 5,6-dihydro-[<sup>13</sup>C<sub>3</sub>]M<sub>1</sub>dG.

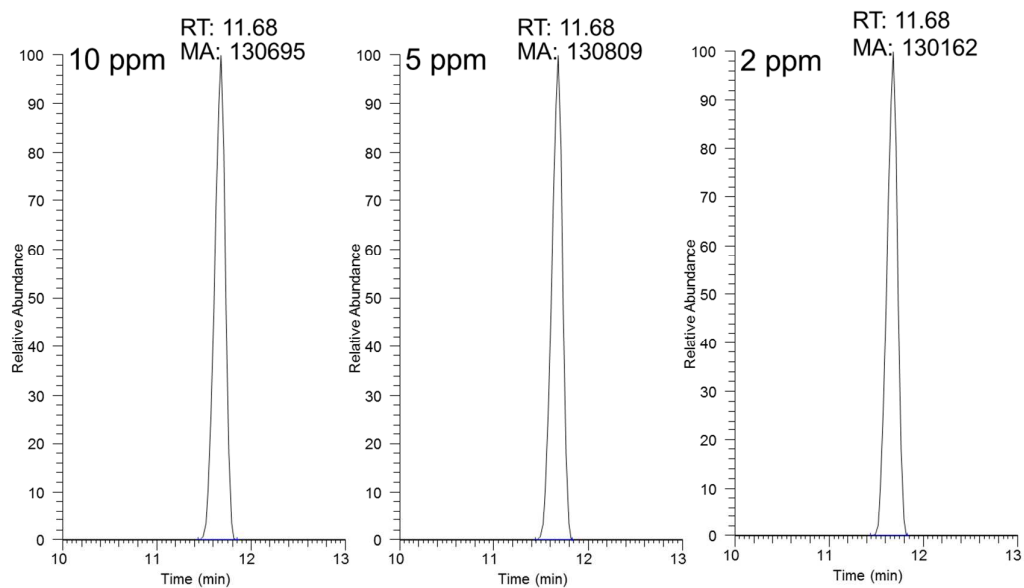

Figure S4. The extracted ion chromatograms for 5,6-dihydro-M<sub>1</sub>dG at mass tolerances of (A) 10 ppm, (B) 5 ppm, and (C) 2 ppm using the Orbitrap detector. The MS transition for 5,6-dihydro-M<sub>1</sub>dG was  $m/z$  306.1→190.0723. No obvious difference was observed when the mass tolerance was set at different values.
